1  
2  
3  
4  
5  
6  
7  
8  
9  
10  
11  
12  
13  
14  
15  
16  
17  
18  
19  
20  
21

**Variation in *Leishmania* chemokine suppression driven by diversification of  
the GP63 virulence factor**

Authors: Alejandro L. Antonia<sup>1</sup>, Amelia T. Martin<sup>1</sup>, Liuyang Wang<sup>1</sup>, Dennis C. Ko<sup>1,2,3</sup>

Affiliations

<sup>1</sup>Department of Molecular Genetics and Microbiology, School of Medicine, Duke University,  
Durham, NC 27710, USA

<sup>2</sup>Division of Infectious Diseases, Department of Medicine, School of Medicine, Duke University,  
Durham, NC 27710, USA

<sup>3</sup>Lead contact

\*To whom correspondence should be addressed: Dennis C. Ko, 0049 CARL Building Box 3053,  
213 Research Drive, Durham, NC 27710. 919-684-5834. [dennis.ko@duke.edu](mailto:dennis.ko@duke.edu).  
@denniskoHiHOST

## 22 **Abstract**

23           Leishmaniasis is a neglected tropical disease with diverse infection outcomes ranging from  
24 self-healing lesions, to progressive non-healing lesion, to metastatic spread and destruction of  
25 mucous membranes. Although resolution of cutaneous leishmaniasis is a classic example of type-  
26 1 immunity leading to well controlled self-healing lesions, an excess of type-1 related  
27 inflammation can contribute to immunopathology and metastatic spread of disease. *Leishmania*  
28 genetic diversity can contribute to variation in polarization and robustness of the immune response  
29 through differences in both pathogen sensing by the host and immune evasion by the parasite. In  
30 this study, we observed a difference in parasite chemokine suppression between the *Leishmania*  
31 (*L.*) subgenus and the *Viannia* (*V.*) subgenus, which is associated with severe immune mediated  
32 pathology such as mucocutaneous leishmaniasis. While *Leishmania* (*L.*) subgenus parasites utilize  
33 the virulence factor and metalloprotease glycoprotein-63 (*gp63*) to suppress the type-1 associated  
34 host chemokine CXCL10, *L. (V.) panamensis* did not suppress CXCL10. To understand the  
35 molecular basis for the inter-species variation in chemokine suppression, we used *in silico*  
36 modeling of the primary amino acid sequence and protein crystal structures to identify a putative  
37 CXCL10-binding site on GP63. We found the putative CXCL10 binding site to be located in a  
38 region of *gp63* under significant positive selection and that it varies from the *L. major* wild-type  
39 sequence in all *gp63* alleles identified in the *L. (V.) panamensis* reference genome. We determined  
40 that the predicted binding site and adjacent positively selected amino acids are required for  
41 CXCL10 suppression by mutating wild-type *L. (L.) major gp63* to the *L. (V.) panamensis* allele  
42 and demonstrating impaired cleavage of CXCL10 but not a non-specific protease substrate.  
43 Notably, *Viannia* clinical isolates confirmed that *L. (V.) panemensis* primarily encodes non-  
44 CXCL10-cleaving *gp63* alleles. In contrast, *L. (V.) braziliensis* has an intermediate level of

45 activity, consistent with this species having more equal proportions of both alleles at the CXCL10  
46 binding site, possibly due to balancing selection. Our results demonstrate how parasite genetic  
47 diversity can contribute to variation in the host immune response to *Leishmania* spp. infection that  
48 may play critical roles in the outcome of infection.

49

## 50 **Introduction**

51 Parasites in the genus *Leishmania* infect over 1.6 million people annually causing a diverse  
52 collection of diseases ranging from visceral systemic illness to simple self-resolving cutaneous  
53 lesions to diffuse non-healing lesions with metastatic spread(1, 2). This diverse spectrum of disease  
54 outcomes is in part mediated by parasite genetic diversity influencing the host-immune response.  
55 Due to the high psychological and social impact caused by disfiguring skin lesions(3), and current  
56 drug options limited by high prices and severe side effects(4), improved understanding of the  
57 mechanisms underlying differential disease outcome is paramount.

58 Although cutaneous leishmaniasis canonically requires T-helper 1 polarization for lesion  
59 resolution, improved understanding of the parasite diversity has led to the elucidation of multiple  
60 exceptions to this rule. Experiments using the murine model of leishmaniasis defined the T-helper  
61 ( $T_h$ ) cell polarization dichotomy where  $T_h1$  polarization in C57BL6 mice protects against  
62 cutaneous leishmaniasis and  $T_h2$  polarization in BALB/c mice leads to progressive non-healing  
63 infections(5, 6). Similarly, humans with self-healing lesions have higher levels of  $T_h1$  associated  
64 cytokines(7-9). However, studies in mice and humans have revealed instances where type 1  
65 immune responses are not protective against cutaneous leishmaniasis. For example, mice infected  
66 with the *L. (L.) major* Seidman strain develop non-healing lesions despite robust  $T_h1$   
67 polarization(10, 11). Additionally, patients infected with parasites belonging to the *Viannia*

68 subgenus of parasites have lesions characterized by significantly elevated expression of type-1  
69 associated cytokines such as *IFN- $\gamma$* , *Granzyme-B* and *CXCL10(12-14)*. Further, these markers of  
70 type-1 associated immunopathology are exacerbated by infection of the parasite with the  
71 *Leishmania* RNA virus (LRV1)(15) or co-infection of the mouse with lymphocytic  
72 choriomeningitis virus (LCMV) (16, 17). These exceptions to the rule of protective type-1  
73 immunity raise the question: what determines if a type-1 immune response protects the patient or  
74 exacerbates disease?

75 Clues to answering this question may come from understanding *Leishmania* strategies to  
76 evade the host immune response(18). *Leishmania* spp. parasites evade the host immune response  
77 by diverse mechanisms including inhibition of phagolysosome development, antigen cross-  
78 presentation, and intracellular macrophage signaling (reviewed in Gupta et al. 2013(19)). One  
79 virulence factor involved in multiple mechanisms of immune evasion is the matrix-metalloprotease  
80 glycoprotein-63 (*gp63*)(20) which is able to cleave host substrates involved in anti-parasitic  
81 defense including complement C3b(21), the myristolated alanine rich C kinase substrate  
82 (MARCKS)(22), and *CXCL10*(23). These mechanisms interfere with the host response after  
83 infection thereby modulating the balance between protection and pathogenesis.

84 Parasite genetic diversity also drives differences in disease outcome through both host  
85 pathogen sensing and pathogen immune evasion. Although there is a high degree of conservation  
86 and synteny between parasite strains, differences in genetic structural elements such as gene  
87 duplications and losses, transposable elements, and pseudogenes are thought to play a role in  
88 mediating distinct disease outcomes(24, 25). These differences are highlighted within the *Viannia*  
89 subgenus, which is associated with lesions characterized by host-cytotoxic immunopathology.  
90 Differences in the structure of the lipophosphoglycans produced by *L. (V.) braziliensis* and *L. (L.)*

91 *infantum* lead to different patterns of toll-like receptor (TLR) activation(26). Beyond sensing,  
92 parasite genetic variation facilitates the generation of diverse immune evasion strategies. For  
93 example, parasites in the *Viannia* subgenus have undergone a significant expansion in copy  
94 number corresponding with an increase in genetic variation of *gp63*(27-30). This diversification  
95 correlates with variation in *gp63* expression and the downstream effect of phagolysosome  
96 maturation between different *L. (V.) braziliensis* isolates(31)<sup>31</sup>. Furthermore, evolutionary studies  
97 have identified a region of positive selection around the active site hypothesized to alter substrate  
98 specificity(32, 33). However, specific genetic polymorphisms responsible for driving observed  
99 phenotypic differences between parasites that cause distinct forms of disease have yet to be  
100 established.

101 In this study, we characterize how genetic diversity results in variation in function of the  
102 glycoprotein-63 virulence factor between the *Leishmania* and *Viannia* subgenera. We observed  
103 that *Viannia* parasites have reduced capacity to cleave CXCL10 by GP63, highlighted by complete  
104 loss of cleavage by *L. (V.) panamensis*. To define how interspecies *gp63* variation results in loss  
105 of CXCL10 cleavage, we used a combination of modeling protein-protein interactions and  
106 identification of sites under evolutionary pressure. First, protein-protein modeling of the GP63-  
107 CXCL10 interaction revealed a putative CXCL10 binding site that is mutated from D463 to N463  
108 preferentially in the *Viannia* subgenus. Screening additional *Viannia* species demonstrated that  
109 parasites containing both alleles have an intermediate CXCL10 suppression phenotype.  
110 Subsequently, using the mixed effects model of evolution (MEME) we found that of 4 out of 79  
111 individual amino acids under episodic positive selection are located within 5 amino acid residues  
112 of the predicted CXCL10 binding site. Finally, site-directed mutagenesis of *L. (L.) major gp63* at  
113 the predicted CXCL10 binding site (D463N), as well as adjacent residues under significant

114 episodic positive selection, confirmed this region is involved in cleavage of CXCL10 but not the  
115 nonspecific substrate azocasein. Understanding how genetic diversity of GP63 and other virulence  
116 factors lead to differences in immune phenotypes between divergent *Leishmania* spp. will be  
117 critical in the design and proper application of novel therapies for the prevention and treatment of  
118 leishmaniasis.

119

## 120 **Results**

### 121 *Glycoprotein-63 produced by L. (V.) panamensis (PSC-1) does not cleave human CXCL10*

122 As *Viannia* parasites induce high *cxcl10* expression(12, 13, 15) and have a large copy  
123 number expansion(27, 29) of the CXCL10-cleaving protease GP63(23), we asked whether  
124 *Leishmania Viannia panamensis* infection results in a net increase or decrease of CXCL10 protein.  
125 PMA-differentiated THP-1 macrophages infected with *L. (L.) major* induced host *cxcl10*  
126 transcription but completely suppressed the induction at the protein level (Fig. 1A, B), consistent  
127 with our previous observations(23). In contrast, despite the large copy number expansion of *gp63*  
128 in *Viannia* parasites, *L. (V.) panamensis* infection resulted in higher induction of *cxcl10* transcript  
129 and no suppression of CXCL10 protein (Fig. 1A, B).

130 An inability of *L. (V.) panamensis* to overcome the increased *cxcl10* transcript could be  
131 due to either a lack of *gp63* expression or a reduction in GP63 cleavage activity. To compare *gp63*  
132 expression, we measured *gp63* mRNA by *L. (V.) panamensis* and *L. (L.) major* in cultured  
133 promastigotes at the time of infection. The two *Leishmania* spp. expressed comparable *gp63*  
134 mRNA (Fig. 1C), suggesting that differences in gene expression do not account for the observed  
135 lack of CXCL10 suppression by *L. (V.) panamensis*. To compare the ability of *L. (V.) panamensis*  
136 and *L. (L.) major* to cleave equivalent amounts of recombinant CXCL10 and control for variation

137 in host chemokine production, we incubated parasites with human recombinant CXCL10. *L. (L.)*  
138 *major* that is *gp63* deficient ( $\Delta gp63$ ) and complemented ( $\Delta gp63+gp63-1$ ) were included as  
139 controls. Wildtype *L. (L.) major* cleaved the majority of CXCL10 by 1 hour; however, there was  
140 no significant reduction of CXCL10 by *L. (V.) panamensis* relative to the  $\Delta gp63$  strain (Fig. 1D).  
141 Next, we tested whether this was due to a complete loss of proteolytic activity or a change in  
142 substrate-specific activity by repeating the cleavage assay with the non-specific colorimetric  
143 substrate azocasein. *L. (V.) panamensis* cleaved significantly more azocasein than the  $\Delta gp63$   
144 strain, although still had reduced activity relative to wild-type *L. (L.) major* (Fig. 1E). Therefore,  
145 the lack of CXCL10 suppression by *L. (V.) panamensis* is due to loss of substrate-specific  
146 enzymatic activity of GP63.

147

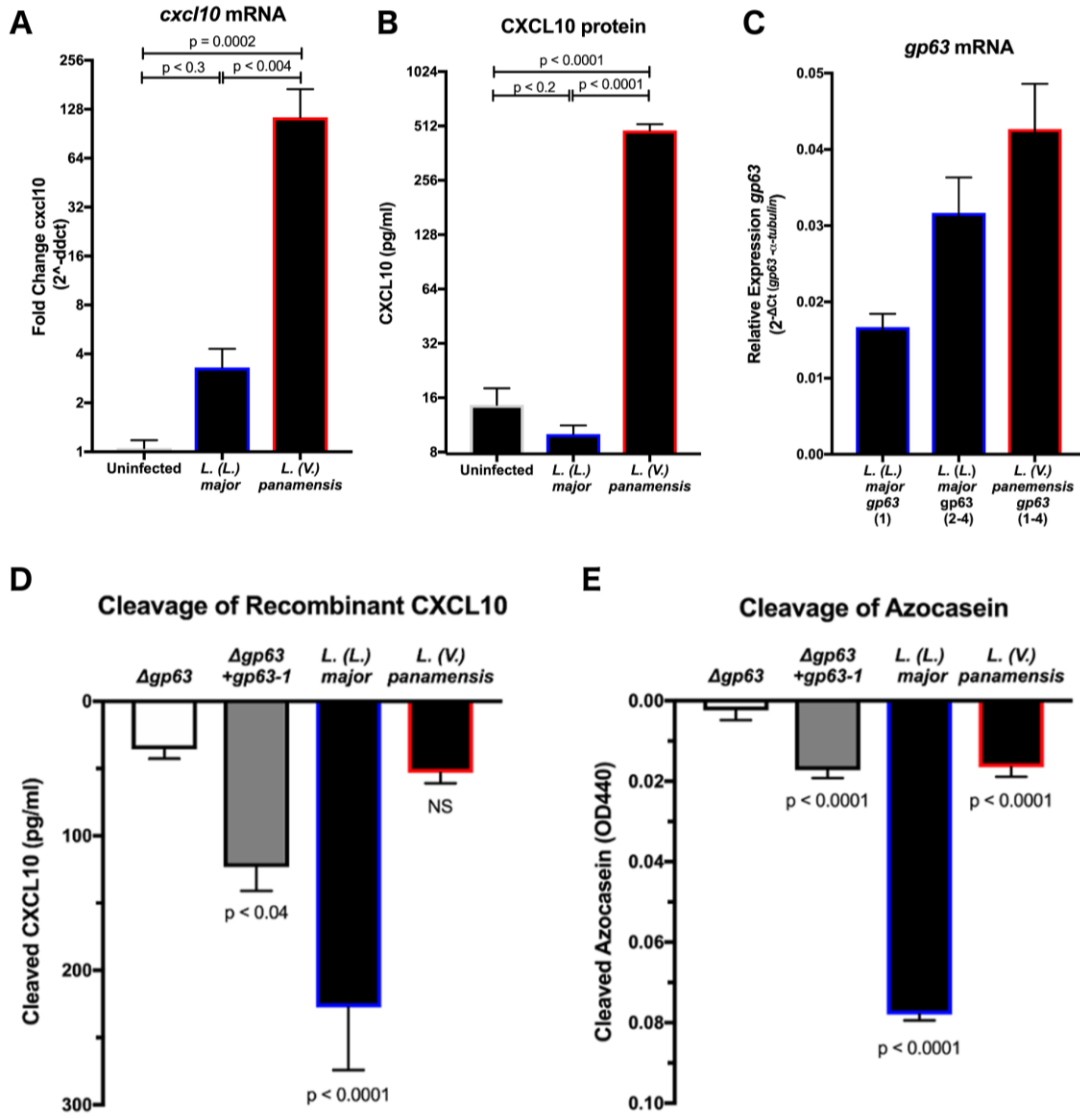



**Figure 1. *Leishmania Viannia panamensis* lacks glycoprotein-63 dependent cleavage of human CXCL10.**

(A) *L. (L.) major* and *L. (V.) panamensis* infection results in increased CXCL10 transcript in THP-1 monocytes. PMA differentiated THP-1 monocytes were infected with *L. (L.) major* Friedlin or *L. (V.) panamensis* PSC-1 at an MOI of 10 for 24 hours. mRNA was quantified by RT-PCR for human CXCL10 relative to *rRNA45s5* housekeeping gene by  $\Delta\Delta C_t$ . Average fold change ( $2^{-\Delta\Delta C_t}$ ) +/- standard error of the mean is plotted for 8-9 biological replicates across three independent experiments. P-values calculated by one-way ANOVA with Holm-Sidak post-hoc test on  $C_t$  values.

(B) *L. (L.) major* but not *L. (V.) panamensis* infection suppresses CXCL10 protein in THP1 monocytes. CXCL10 protein was measured from the supernatants of infected PMA differentiated THP-1 monocytes 24 hours post infection by ELISA. Samples below the ELISA range were set to the lower limit of detection (7.8125 pg/ml). Mean +/- standard error of the mean is plotted for 8-9 biological replicates across three independent experiments. P-values calculated by one-way ANOVA with Holm-Sidak post hoc test on  $\log_2([CXCL10])$ .

(C) *L. (L.) major* and *L. (V.) panamensis* both express gp63 mRNA at the time of infection. Parasite mRNA was obtained from parasites incubated at 37°C for 1 hour. mRNA was quantified by RT-PCR for *Leishmania gp63* relative to  $\alpha$ -tubulin housekeeping gene by  $\Delta\Delta C_t$ . For primer design to quantify *gp63* expression in different species: *L. (L.) major* Friedlin *gp63* required two sets of primers to amplify four copies of *gp63* due to sequence variation, whereas *L. (V.) panamensis* required a single set of primers due to greater homology between four unique copies. Relative expression ( $2^{-\Delta\Delta C_t}$ ) is plotted as mean +/- standard error of the mean for three biological replicates across three independent experiments.

(D) *L. (L.) major* but not *L. (V.) panamensis* cleaves human recombinant CXCL10.  $1 \times 10^6$  parasites were incubated with 500pg/ml of human recombinant CXCL10 at 37°C for 1 hour prior to measuring the remaining CXCL10 by ELISA. Cleaved CXCL10 was calculated by subtracting the CXCL10 in the parasite conditions from a no-parasite media control. Mean cleaved CXCL10 +/- standard error of the man is plotted from 10 biological replicates across 5 independent experiments.

(E) *L. (L.) major* and *L. (V.) panamensis* both cleave the non-specific colorimetric protease substrate azocasein.  $5 \times 10^7$  parasites were incubated with 50mg/ml of azocasein at 37°C for 5 hours. Cleaved azocasein was determined by subtracting OD440 from the no-parasite media control. Mean OD440 of cleaved azocasin +/- standard error the mean is plotted from 7 biological replicates across 5 independent experiments. For (D) and (E), P-values calculated by one-way ANOVA comparing all samples to the *gp63* negative control by Holm-Sidak post-hoc test.

149

150 Identification of predicted CXCL10 binding site on GP63

151 We hypothesized that *gp63* sequence diversity drives the phenotype of reduced CXCL10  
152 cleavage by *L. (V.) panamensis*. To test this hypothesis, we modeled where CXCL10 binds to  
153 GP63 relative to known functional residues on the protease. The machine learning approach in  
154 xgBoost Interface Prediction of Specific-Partner Interactions (BIPSPI)(34) identified a region of  
155 three consecutive amino acids on GP63 (Y461, S462, and D463) in the C-terminal domain distant  
156 from the predicted matrix metalloprotease substrate binding pocket(35) (Fig. 2A; complete results  
157 summarized in Table S1). The site is also distal from known glycosylation sites involved in protein  
158 folding and stability(36), the protease active site(37), secretion signal(38), and putative cysteine  
159 switch regulatory element(37) (Fig. 2A). Further, this site varied between *Leishmania* and *Viannia*

160 subgenera based on 54 available full length *gp63* sequences (Fig. 2B; 34 *Leishmania*, 18 *Viannia*,  
161 2 *Sauroleishmania*). Thus, the region identified by BIPSI is distinct from known functional  
162 domains of GP63 and is divergent between *Leishmania* and *Viannia* subgenera.

163 *In silico* modeling of the 3D protein-protein interaction using Zdock(39) demonstrated a  
164 close physical approximation of the GP63 active site catalytic zinc ion to the cleavage site on  
165 CXCL10 (Fig. 2C-F). First, GP63 and CXCL10 were loaded into Zdock with no prior information  
166 regarding binding. In the top 10 modelling predictions from this unbiased approach CXCL10  
167 consistently localized to the binding pocket; however, no consensus emerged for the chemokine  
168 orientation within the binding pocket and the average distance from cleavage site to catalytic zinc  
169 ion was  $31.92 \pm 7.27 \text{ \AA}$  (Fig. 2D). Second, the Zdock modeling was repeated with the contact  
170 residues predicted by BIPSPI specified. This resulted in a consistent fit of CXCL10 into the GP63  
171 binding pocket with the average distance between the CXCL10 cleavage site(23) and catalytic zinc  
172 ion decreased to  $12.55 \pm 2.52 \text{ \AA}$  (Fig. 2D). Notably, the smallest predicted distance between  
173 substrate cleavage site and the enzyme catalytic zinc ion was  $8.00 \text{ \AA}$  which is consistent with the  
174 observed distance from the co-crystal structure of matrix-metalloprotease-1 and collagen (PDB:  
175 4AUO)(40). Therefore, the predicted binding site leads to orientation of CXCL10 such that the  
176 cleavage site is accessible by the GP63 active site.

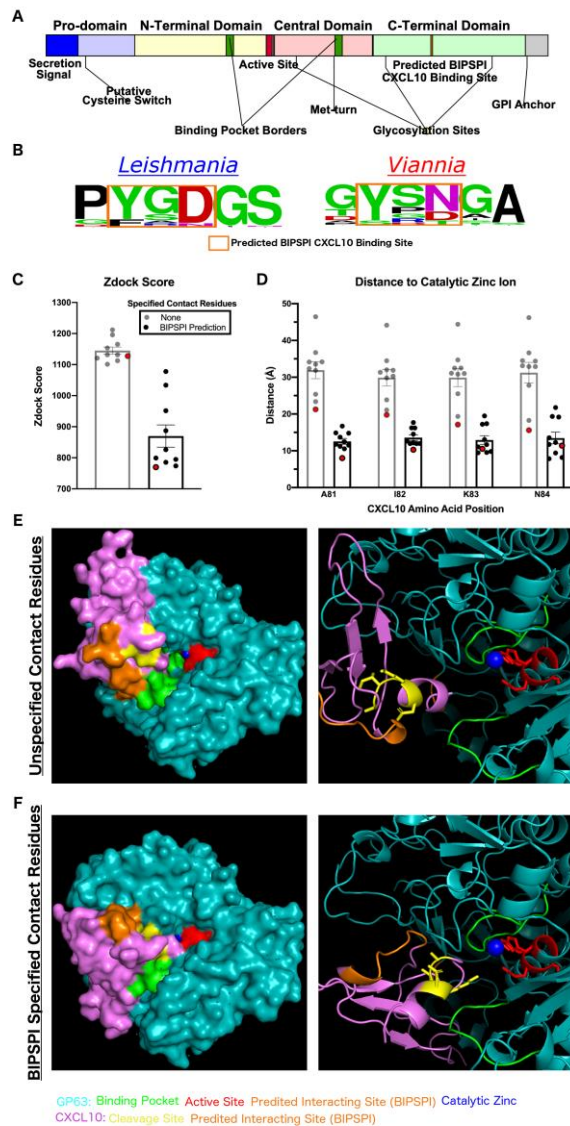

**Figure 2. Protein-protein interaction modeling demonstrates a putative CXCL10 binding site on GP63 that closely approximates the GP63 active site and CXCL10 cleavage site.**

(A) The predicted CXCL10 binding site is distal from previously described functional residues on GP63. Domain diagram of GP63 protein summarizing known functional and structural features.

(B) The predicted CXCL10 binding site is nearly invariant among the *Leishmania* subgenus at position D463 and has been mutated to N463 preferentially in the *Viannia* subgenera. 54 homologues of *gp63* from *L. major* (*LmjF\_10.0460*) were identified by BlastP on TriTrypDB. The sequences represent the *Leishmania* (34), *Viannia* (18), and *Sauroleishmania* (2) subgenera. Multisequence alignment created using ClustalOmega. Sequence logo is shown from AA position 460-465 on the *L. major 10.0460* sequence.

(C-F) Modeling of the GP63-CXCL10 interaction with specification of the predicted binding site localizes CXCL10 to the active site and decreases distance to catalytic zinc-ion. GP63 (PDB entry 1lml) and CXCL10 (PDB entry 1o7y) protein-protein interaction was modeled using Zdock with either no specified contact residues or the BIPSPI predicted binding site specified as contact residues. (C) The mean Zdock score, an energy based scoring function, is plotted for the top 10 model predictions for each condition. (D) The distance from the known cleavage site on CXCL10, in between A81 and I82, to the catalytic zinc ion was measured using PyMol for the top 10 predicted models. Mean distance in angstroms with SEM is plotted. For (C) and (D) the model with the shortest distance between cleavage site and active site is highlighted in red and the model crystal structures shown in (E) and (F). GP63 is shown in teal and CXCL10 in purple along with annotation of functional residues as follows: GP63 active site in red, CXCL10 cleavage site in yellow, GP63 binding pocket in green, and BIPSPI predicted binding sites in orange.

177

178 Episodic positive selection occurred at residues surrounding the CXCL10 binding site on GP63

179 Given the single amino acid substitution between *Leishmania* and *Viannia* parasites (Fig.

180 2B) at the predicted CXCL10 binding site, we hypothesized that this region is under positive

181 selection that potentially contributes to the phenotype of reduced CXCL10 cleavage. Previous

182 studies have described high rates of variation and evidence of positive selection around the

183 protease active site in the tertiary structure(32, 33). However, these studies included 6 or fewer

184 total *Viannia* sequences and only tested for pervasive selection. In the case of *Leishmania* spp.

185 where there is significant heterogeneity within the phylogenetic structure, this may underestimate  
186 the degree of positive selection by discounting instances where selection only occurred in a subset  
187 of the phylogeny. Therefore, using the 54 sequences identified by BlastP above, we analyzed the  
188 evolutionary pressure on *gp63* using two models: 1) the ConSurf model which generates a  
189 conservation score based on a maximum likelihood estimate of the evolutionary rate at each amino  
190 acid site(41, 42) and 2) the Mixed Effects Model of Evolution (MEME) on the HyPhy platform  
191 which tests for episodic positive selection at each amino acid residue(43). The conservation score  
192 generated by ConSurf showed extremely high conservation around known functional residues such  
193 as the active site, met-turn, and GPI-anchor (Fig. 3A). Amino acids with low conservation scores,  
194 and are therefore highly variable, correlate with the amino acids identified as under positive  
195 selection by MEME (Fig. 3A). One such peak of variation and positive selection encompasses the  
196 putative CXCL10 binding site identified here (Fig. 3A). The high variability and evidence of  
197 positive selection around the CXCL10 binding site is consistent with this region being involved in  
198 substrate binding.

199         Next, we asked whether this pattern of amino acid substitution corresponds to a difference  
200 in *L. (V.) panamensis* specifically or as part of a larger subset of parasites such as the *Viannia*  
201 subgenus. To do so we utilized the empirical bayes factor (EBF), a measure of the strength of  
202 positive selection generated by MEME, to examine the patterns of episodic selection within the  
203 phylogeny for each amino acid residue. The 82 amino acid sites identified as under positive  
204 selection ( $P < 0.05$ ) were categorized based on whether they were positively selected along one or  
205 multiple branches within either the *Leishmania* or *Viannia* subgenera (Fig. 3B). 4 positively  
206 selected residues ( $p < 0.1$ ) were identified within 5 amino acid residues of the putative CXCL10  
207 binding site. Three of these sites were mutated away from the consensus *Leishmania* subgenus

208 residue in all sequences from the *L. (V.) panamensis* reference genome and in at least 17 out of 18  
209 *Viannia* sequences analyzed: P460G, S465A, T467N (Fig. 3C). These results suggest that the  
210 change in GP63 substrate specificity is generalizable to other parasites in the *Viannia* subgenus.

211

212 *Viannia* parasites demonstrate variable CXCL10 suppression corresponding to frequency of the  
213 *CXCL10* specific *gp63* allele.

214 To test whether this predicted difference in substrate specificity applied to additional  
215 *Leishmania* and *Viannia* parasites, we repeated the CXCL10 cleavage assay using *L. (L.) donovani*,  
216 *L. (L.) venezuelensis*, *L. (L.) tropica*, *L. (V.) guyanensis*, and *L. (V.) braziliensis*. Similar to *L. (V.)*  
217 *panamensis* the other two *Viannia* species tested cleaved less CXCL10 compared to the  
218 *Leishmania* species (Fig. 3D). Notably, they demonstrated an intermediate capacity to cleave  
219 CXCL10, which is consistent with the observation that unlike *L. (V.) panamensis*, *L. (V.)*  
220 *braziliensis* parasites have a mixture of *gp63* expansion copies, some of which retain the D463  
221 allele present in the *Leishmania* subgenera while others have the *Viannia* specific N463 allele (Fig.  
222 3C). Together this data suggests that *Viannia* parasite infection results in greater CXCL10 due to  
223 reduced GP63-mediated chemokine suppression in addition to previously described differences in  
224 host-parasite sensing.

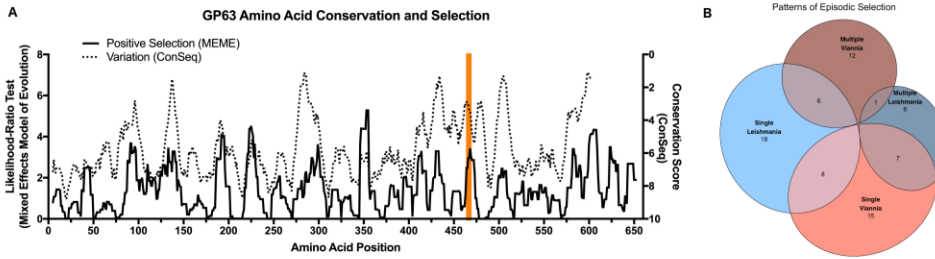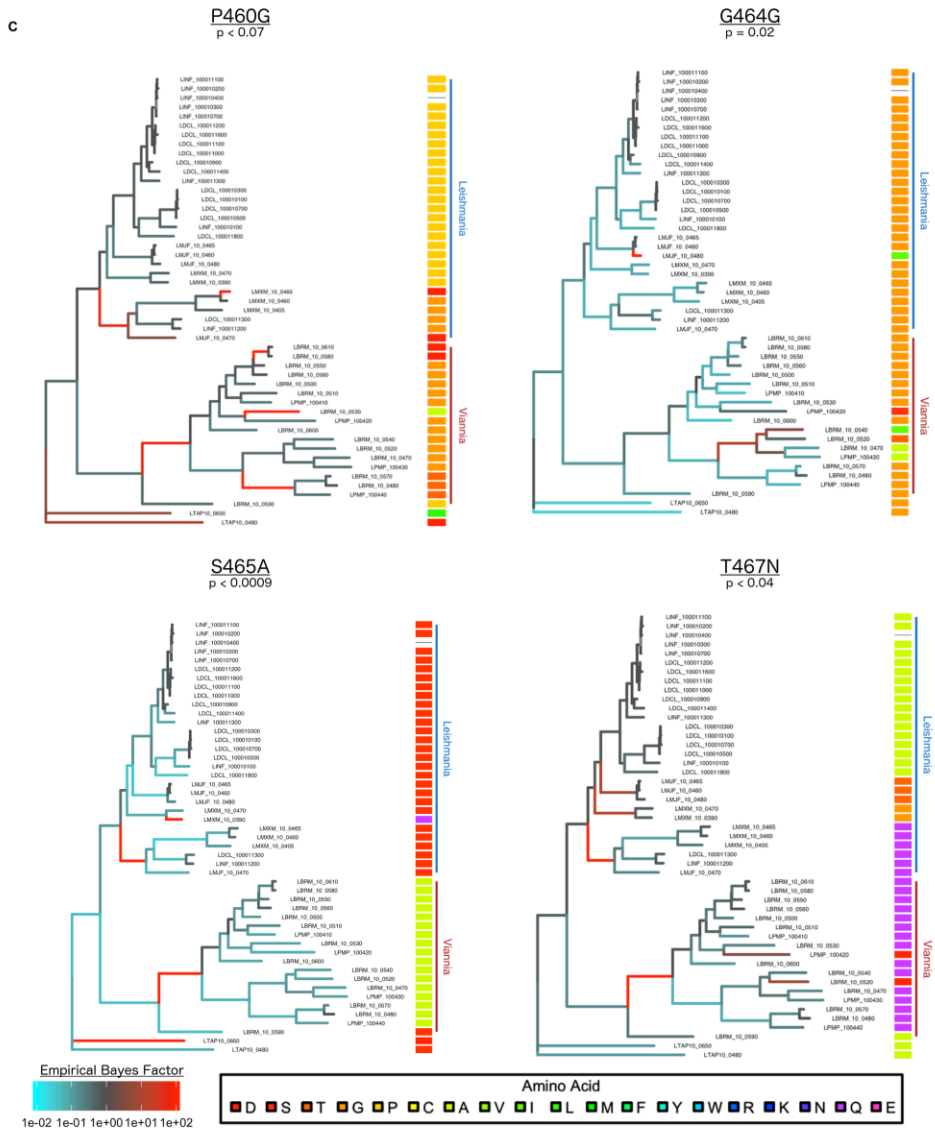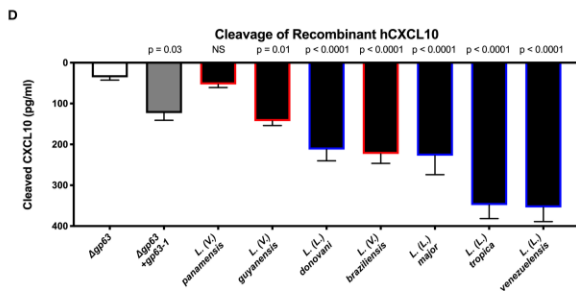

**Figure 3. *gp63* has undergone significant positive selection between the *Leishmania* and *Viannia* subgenera, with a peak of selection identified around the CXCL10 binding site.**

(A) *GP63* contains multiple regions of high diversity under strong positive selection, including the region containing the CXCL10 binding site. The conservation score was generated by the ConSeq method and ranges from 1 (highly variable) to 9 (highly conserved). Positive selection was tested at each amino acid by the likelihood ratio test from the Mixed Effects Model of Evolution (MEME). Higher likelihood ratio indicates stronger signal of positive selection. Both the conservation score and likelihood ratio test are plotted as the moving average over 10 amino acid windows. The putative CXCL10 binding site identified by BIPSPI is highlighted in orange.

(B) *GP63* individual amino acids demonstrate diverse patterns of episodic selection. The MEME test for positive selection generates an empirical bayes factor (EBF) as an estimate of the strength of positive selection for each amino acid along each branch of the phylogenetic tree. Using this measure the patterns of episodic selection were classified as single or multiple events occurring in either the *Leishmania* or *Viannia* subgenera. EBF was set to a threshold of 30 as a cutoff for positive selection.

(C) Residues adjacent to the CXCL10 binding site demonstrate a pattern of exclusive mutation between the *Leishmania* and *Viannia* subgenera. The EBF generated by MEME was plotted onto the phylogenetic tree for positively selected residues ( $p < 0.1$ ) within 5 amino acids of the predicted CXCL10 binding site. The phylogenetic tree was rooted at the node of the most recent common ancestor of the two *Sauroleishmania* sequences identified. The amino acid residue for each sequence at the indicated position is plotted based on a multisequence alignment generated in ClustalOmega and used for both evolutionary tests above.

(D) *L. Viannia guyanensis* and *L. Viannia braziliensis* parasites have an intermediated CXCL10 cleavage phenotype consistent with the observation of mixed D463 and Y463 alleles in the *Viannia* subgenus. The CXCL10 cleavage assay described in Figure 1 was repeated with *L. (L.) donovani*, *L. (L.) venezuelensis*, *L. (L.) tropica*, *L. (V.) guyanensis*, and *L. (V.) braziliensis*.  $1 \times 10^6$  parasites were incubated with 500pg/ml of human recombinant CXCL10 at 37°C for 1 hour prior to measuring the remaining CXCL10 by ELISA. Cleaved CXCL10 was calculated by subtracting the CXCL10 in the parasite conditions from a no-parasite media control. Mean  $\pm$  SEM is plotted from 10 biological replicates across 5 separate experiments. P-values calculated by one-way ANOVA with Holm-Sidak test comparing each species to the *L. major* *Agp63* allele.

226

227 Mutagenesis of positively selected residues near the CXCL10 binding site on *L. (L.) major gp63*  
228 to the *L. (V.) panamensis* sequence significantly impairs CXCL10 cleavage.

229 We sought to experimentally test how the putative CXCL10 binding site and surrounding  
230 residues under positive selection between *Leishmania* and *Viannia* subgenera (summarized in Fig.  
231 4A) alter the kinetics of CXCL10 cleavage by GP63. Using site directed mutagenesis of an *L.*  
232 *major gp63* overexpression plasmid, we mutated the CXCL10 binding site and nearest positively  
233 selected residues (Fig. 4B), expressed these constructs from HEK-293T cells, and assayed  
234 conditioned media containing equal amounts of WT and mutant GP63. *L. major gp63<sup>PYS~~D~~G~~S~~</sup>*,  
235 *gp63<sup>PYS~~N~~G~~S~~</sup>*, or *gp63<sup>GYS~~N~~G~~A~~</sup>* was incubated with CXCL10 at 1000pg/ml for 2 hours to measure the  
236 cleavage rate. The wildtype *gp63<sup>PYS~~D~~G~~S~~</sup>* has a significantly higher CXCL10 cleavage rate (6.07  
237 pg/ml/min) than both *gp63<sup>PYS~~N~~G~~S~~</sup>* (1.16 pg/ml/min;  $p=0.04$ ) and *gp63<sup>GYS~~N~~G~~A~~</sup>* (0.14pg/ml/min;

238 p=0.01). Notably, the single mutation at position D463 predicted by BIPSPI resulted in incomplete  
239 abrogation of CXCL10 cleavage; however, in combination with mutation of the adjacent residues  
240 under positive selective pressure the cleavage rate was further reduced (Fig. 4C-D). To determine  
241 whether these mutations caused an overall loss in total proteolytic activity, all copies of *gp63* were  
242 also incubated with the non-specific substrate azocasein at 50 mg/ml and monitored over 24 hours.  
243 There was no significant difference in azocasein cleavage rate between the wildtype and either  
244 mutated copies of *gp63* (Fig. 4E-F) indicating that the observed loss of CXCL10 cleavage is not  
245 due to a reduction in total proteolytic activity. Together these data indicate that sequence variation  
246 of GP63 in the *Viannia* subgenus contributes to substrate specificity and differences in chemokine  
247 suppression. Specific changes that have been selected for in *L. panamensis* and other *Viannia*  
248 parasites markedly reduce CXCL10 cleavage while having minimal effect on overall proteolytic  
249 activity.



**A**

| Summary of Predicted CXCL10 Binding Site on GP63 |      |      |      |      |      |      |       |
|--------------------------------------------------|------|------|------|------|------|------|-------|
| AA Position                                      | 459  | 460  | 461  | 462  | 463  | 464  | 465   |
| <i>Leishmania gp63</i> Sequence                  |      |      |      |      |      |      |       |
| <i>L. (L.) major</i> (10.0460)                   | V    | P    | Y    | S    | D    | G    | S     |
| <i>L. (V.) panamensis</i> (10.0410)              | L    | G    | Y    | S    | N    | G    | A     |
| Sequence Characteristics                         |      |      |      |      |      |      |       |
| Predicted Binding (BIPSPI)                       | -    | -    | +    | +    | +    | -    | -     |
| Positive Selection (Likelihood Ratio Test)       | 0.30 | 3.90 | 1.73 | 0.00 | 0.00 | 6.20 | 12.45 |

**B**

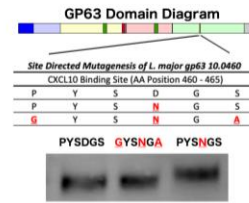

**C**

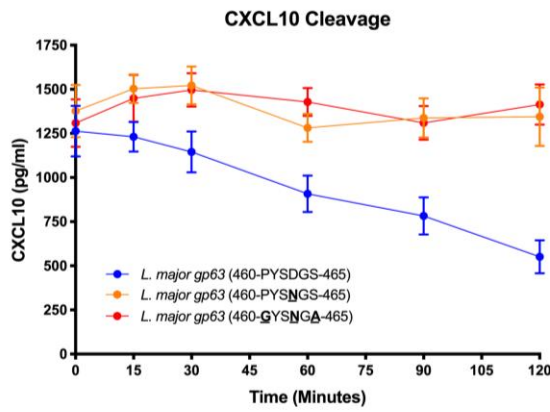

**D**

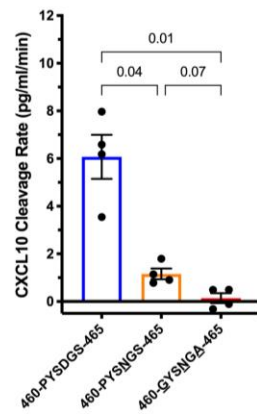

**E**

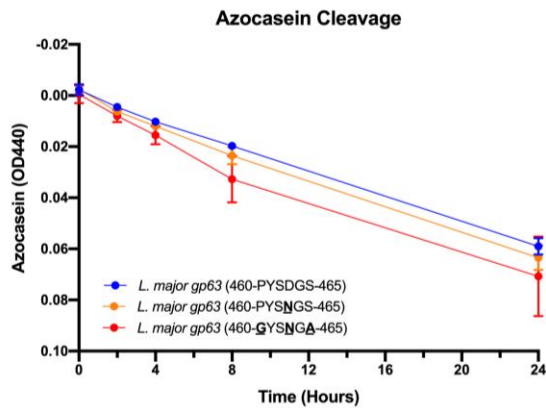

**F**

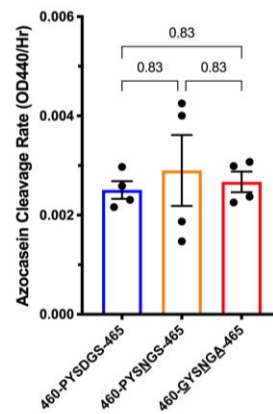

**Figure 4. Mutagenesis of *L. (L.) major* CXCL10 binding site to *L. (V.) panamensis* residues reduces CXCL10, but not azocasein, cleavage.**

(A) *The predicted CXCL10 binding site is in a highly variable region of gp63 with multiple adjacent residues under positive selection. Summary of the predicted *L. (L.) major* and *L. (V.) panamensis* CXCL10 binding alleles from BIPSPI analysis and degree of positive selection as measured by likelihood ratio test from MEME. Amino acid position number is reported relative to the *L. major gp63 10.0460* gene.*

(B) *Generation of CXCL10 binding site mutants by site-directed mutagenesis of the *L. major* GP63 WT sequence. The wild-type *L. major gp63* CXCL10 binding allele (460-PYSDGS-465) cloned in an overexpression vector was mutated to the *L. panamensis* allele at the BIPSPI predicted binding site D463 (460-PYSN<sup>U</sup>GS) and at the adjacent positively selected residues (GYSNGA). All three *gp63* plasmids were overexpressed in HEK293T cells and GP63 protein recovered from culture supernatants. Total GP63 protein was assessed by western blot, and samples were then diluted to equal concentration before downstream use. Representative western blot of normalized GP63 from culture supernatants is shown.*

(C-D) **L. (L.) major gp63* allele mutated to the *L. (V.) panamensis* allele at the CXCL10 binding site impairs CXCL10 cleavage. Equal amounts of GP63 protein from each mutant were incubated with 1000pg/ml of CXCL10 for 2 hours. The remaining CXCL10 in the reaction was measured by ELISA. Change in CXCL10 over time is shown in (C) and the rate of cleavage determined by linear regression is shown in (D).*

(E-F) **L. (L.) major gp63* allele mutated to the *L. (V.) panamensis* allele at the CXCL10 binding site does not alter azocasein cleavage. Equal amounts of GP63 protein from each mutant were incubated with 50mg/ml of azocasein for 24 hours. Cleaved azocasein was determined by measuring OD440 above background determined by the no-parasite media control. Change in azocasein over time is shown in (E) and the rate of cleavage determined by linear regression is shown in (F).*

For (C-F) mean +/- the standard error of the mean is plotted from 4 unique experiments representing recombinant GP63 generated from two separate transfections. For D and F, P-values calculated by one-way ANOVA with holm-sidak post-hoc test.

251  
252 *Within the Viannia subgenus, clinical isolates of *L. (V.) braziliensis* have a higher proportion of*  
253 *the CXCL10 cleaving GP63 D463 allele compared to *L. (V.) panamensis*.*

254 We next sought to determine the potential for the relative amounts of D463 and N463  
255 alleles to contribute to variation in leishmaniasis by analyzing GP63 sequence variation from  
256 recently isolated parasites from Colombia and Bolivia (44, 45). Patino et al. sequenced whole  
257 genomes from parasites (19 *L. (V.) panamensis*(44) and 7 *L. (V.) braziliensis*(45)) from 26 infected  
258 patients. Due to the high rates of *gp63* gene duplication and copy number variation, significant  
259 genetic heterogeneity occurs among parasite isolates and structure of the region is poorly  
260 understood even in the reference PSC-1 strain. Therefore, we aligned the available sequences to  
261 the *L. (V.) panamensis* PSC-1 reference genome(25) and quantified the relative D463 and N463  
262 allele frequencies based on the read depth at all mapped *gp63* positions combined. Notably, all *L.*  
263 *(V.) panamensis* isolates predominantly encode the N463 allele which does not cleave CXCL10.

264 However, the *L. (V.) braziliensis* clinical isolates have greater frequency of the CXCL10 cleaving  
265 D463 allele (Fig. 5A-B). There were also additional less frequent variants that encode substitutions  
266 to alanine and threonine at this locus. The variation matched the phylogenetic analysis of  
267 *Leishmania* reference sequences (Fig. 3C) and was consistent with the intermediate CXCL10  
268 cleavage phenotype observed with *L. (V.) braziliensis* (Fig. 3D). The observation that both the  
269 CXCL10 cleaving and non-cleaving allele are present in naturally occurring *Viannia* isolates  
270 confirmed the relevance of this diversity in clinical isolates and suggests that human infection  
271 likely also varies in the type and robustness of CXCL10 mediated inflammation during infection.  
272

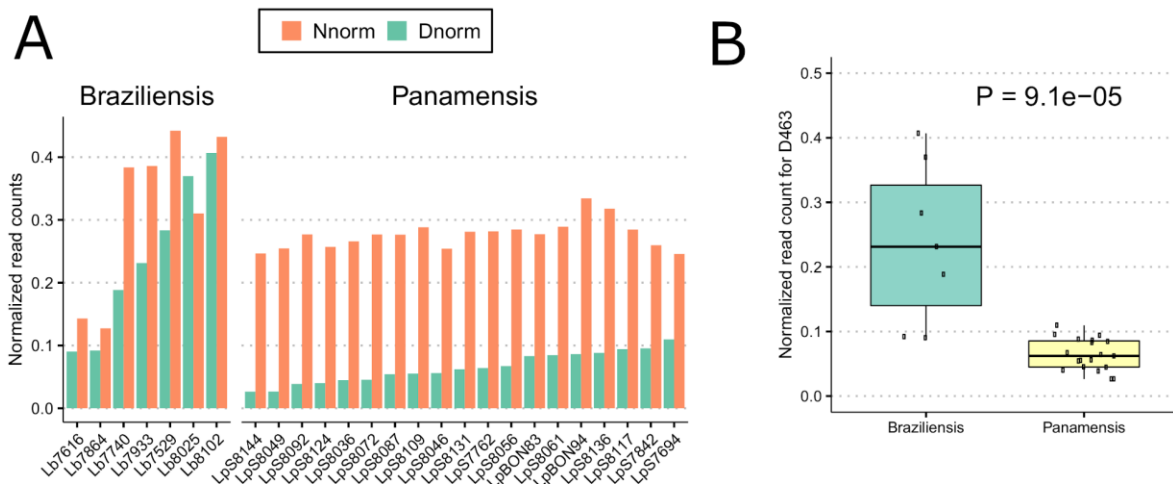

273

**Figure 5. Clinical isolates of *L. (V.) panamensis* have predominantly CXCL10 non-cleaving D463 allele, whereas *L. (V.) braziliensis* have the D463 allele in addition to the CXCL10 cleaving N463.**

(A) Barplot of proportion of CXCL10 cleaving (N463) and non-cleaving (D463) alleles in individual clinical isolates. Short read sequences from 7 *L. (V.) braziliensis* and 19 *L. (V.) panamensis* were obtained from Patino et al. (2020) and Patino et al. (2020) and aligned to the *L. (V.) panamensis* PSC-1 reference genome. We then quantified the number of reads carrying the amino acid allele (N, D, A, or T) at *gp63* position 463. The read number was further normalized to total read depth of each sample with a scale factor of 10000, depicted as “Normalized read counts” (y axis). Amino acid position number is reported relative to the the *L. major* 10.0460 sequence.

(B) *L. (V.) braziliensis* clinical isolates have significantly higher proportion of CXCL10-cleaving D463 allele than *L. (V.) panamensis* isolates. Boxplot of the 26 clinical isolates demonstrates the distribution of D463 frequency across *L. (V.) braziliensis* and *L. (V.) panamensis*. The normalized read counts (y axis) were calculated as described in Figure 5A. P-value calculated using Wilcoxon rank-sum test.

274

275

276 **Discussion**

277 Genetic diversity of *Leishmania* spp. contributes to variable disease presentation, but how  
278 the diversity alters molecular mechanisms to impact disease outcome is incompletely understood.  
279 Here we described how variation in chemokine suppression by the virulence factor *gp63* between  
280 the *Leishmania* and *Viannia* subgenera is driven by genetic variation generated by positive  
281 selection. Thus, we have identified the molecular and evolutionary basis for one difference in  
282 immune evasion between closely related parasites, and undoubtedly more remain to be discovered.

283 We characterized a change in substrate specificity for human CXCL10; however, the  
284 genetic variation between subgenera potentially confers loss or gain of specificity for other GP63  
285 substrates. GP63 has a myriad of described substrates(20) with roles in host defense against  
286 infection ranging from interfering with complement mediated lysis(21) to altering intracellular  
287 signaling(46-48) to impairing antigen cross-presentation(49). Our work here shows that cross  
288 species variation significantly alters GP63 function, resulting in a change in chemokine landscape  
289 during infection. Future studies are needed to establish whether *Leishmania* diversity influences  
290 GP63 specificity and activity for other known substrates. It is also possible that mutations have led  
291 to gain of function for currently undiscovered substrates, which may alter chemokine signaling or  
292 other aspects of the immune response that contribute to the diverse clinical outcomes associated  
293 with *Leishmania* infection.

294 Variation in chemokine response due to GP63 diversity is likely to contribute to the  
295 severity of disease outcome by altering the balance between a well-regulated protective host  
296 immune response and dysregulated immune mediated pathology. *Leishmania major* was used as a  
297 model organism to establish the paradigm of a protective T<sub>h</sub>1 cell response against intracellular  
298 pathogens(5, 6). However, recent advances have described that severe, ulcerative lesions caused

299 by *Viannia* subgenera parasites, including *L. panamensis* and *L. braziliensis*, are characterized by  
300 markedly increased expression of type-1 associated cytokines and chemokines including CXCL10  
301 (13, 50). This is known to be in part due to differences in host Toll-like receptor recognition of the  
302 parasite leading to differences in transcriptional changes(15, 26). Here we uncovered another layer  
303 of this complex host-pathogen interaction where in addition to differences in host sensing, *Viannia*  
304 parasites appear to rely on alternative mechanisms of immune evasion to their related *Leishmania*  
305 parasites. While we observed that both CXCL10 cleaving and non-cleaving alleles occurred in *L.*  
306 (*V.*) *panamensis* and *L. (V.) braziliensis* clinical isolates, the sample size and limited clinical  
307 information was insufficient to determine if the *gp63* allele was associated with specific clinical  
308 outcomes. Thus, future studies are needed to test how this diversity in parasite manipulation of  
309 chemokine signaling impacts pathogenesis in animal models and human disease. Specifically,  
310 given the significant *gp63* genetic diversity in both nucleotide and copy number variations, long-  
311 read sequencing from a large number of clinical derived samples is warranted to accurately map  
312 this region and test for associations with clinical outcomes.

313         The observation that genetic diversity contributes to variation in immune evasion raises the  
314 question as to what factors are responsible for generating and maintaining greater diversity in the  
315 *Viannia* subgenus. The diversification appears to be facilitated by the large copy number expansion  
316 in the *Viannia* subgenus(27, 51). It is possible that the initial gene expansion of *gp63* was driven  
317 by pressure to counteract host CXCL10 production increased in New World *Viannia* infections in  
318 part due to the presence of RNA viruses infecting either parasite or host(12-15, 17). Consistent  
319 with a model of environmental pressure in the New World driving the expansion of GP63, Bussotti  
320 et al. have described a large copy number expansion of GP63 in an *L. (L.) infantum* isolate from  
321 Brazil compared to isolates from the Old World(52). Such gene duplications are a common

322 mechanism allowing for diversification of novel genes in multiple biological systems(53). By  
323 maintaining the original copy, the novel copy confers freedom to explore novel biochemical space  
324 and test new strategies for parasite survival, persistence, and spread. Eventually with a different  
325 strategy to survive in mammalian hosts, the dependence on the older mechanism of CXCL10  
326 suppression could become expendable leading to loss of the CXCL10 specific alleles. Further, the  
327 greater diversity of *gp63* maintained within the *Viannia* subgenera may itself provide an  
328 evolutionary advantage. Within 41 *L. (V.) braziliensis* isolates from a single location in Brazil, 45  
329 different polymorphic alleles were identified within *gp63*(28), and *L. (V.) braziliensis* isolates vary  
330 significantly in several phenotypes of immune modulation *in vitro*(31). A larger pool of sequences  
331 conferring unique substrate specificities can allow for rapid adaptation to new environmental or  
332 host challenges. Additional studies are warranted to further characterize the evolutionary and  
333 functional implications of *gp63* diversity within the *Viannia* subgenus. Regardless of how the  
334 expansion and diversification occurred, our results clearly demonstrate that current *Leishmania*  
335 isolates have genetic variation in *gp63* that contributes to differences in host chemokine levels  
336 during infection. Further, the level of CXCL10 appears to have been selected for by the particular  
337 niche occupied by each *Leishmania* species, with variation in time and space for an optimal level  
338 of CXCL10 resulting in balancing selection and maintenance of diversity for the *Viannia*  
339 subgenus.

340 *Leishmania* genetic diversity creates a complex set of interactions between host and  
341 parasite, but also represents significant opportunities to leverage that diversity to improve our  
342 understanding of mechanisms of pathophysiology. Studies such as this one that link genetic  
343 variation to phenotypic differences in chemokine signaling will be required to fully understand the  
344 parasite factors that contribute to differential host susceptibility to infection. A more complete

345 understanding of this molecular evolution will facilitate the development of biomarkers and host-  
346 directed therapies to improve outcomes of leishmaniasis.

347

## 348 **Materials and Methods**

### 349 *Human Cell Lines and Culture*

350 THP-1 monocytes, originally from the American Type Culture Collection (ATCC), were  
351 obtained from the Duke Cell Culture Facility and maintained in RPMI 1640 media (Invitrogen)  
352 supplemented with 10% fetal bovine serum (FBS), 2 mM glutamine, 100 U/ml penicillin-G, and  
353 100 mg/ml streptomycin. HEK293T cells were obtained from ATCC and maintained in DMEM  
354 complete media (Invitrogen) supplemented with 10% FBS, 100 U/ml penicillin-G, and 100 mg/ml  
355 streptomycin. All cell lines were maintained at 37°C with 5% CO<sub>2</sub>. For phorbol 12-myristate 13-  
356 acetate (PMA) differentiation of THP-1 monocytes,  $1.2 \times 10^6$  cells were placed in 2 mL of  
357 complete RPMI 1640 media supplemented with 100 ng/mL of PMA for 16 hours after which the  
358 RPMI media was replaced and cells allowed to rest for 24 hours prior to infection.

359

### 360 *Parasite Culture and Infections*

361 All *Leishmania* parasites were maintained in M199 supplemented with 100U/ml  
362 penicillin/streptomycin and 0.05% hemin. The following parasites strains were obtained from  
363 Biodefense and Emerging Infections (BEI) Resources or ATCC: *L.*  
364 *major*  $\Delta gp63$  [(MHOM/SN/74/SD)  $\Delta gp63$  1-7, NR-42489], *L.*  
365 *major*  $\Delta gp63+1$  [(MHOM/SN/74/SD)  $\Delta gp63$  1-7 + *gp63-1*, NR-42490], *L. major* Friedlin V1  
366 [(MHOM/IL/80/FN) NR-48815], *L. tropica* [(MHOM/AF/87/RUP) NR-48820], *L.*  
367 *donovani* [(MHOM/SD/62/1S) NR-48821], *L. venezuelensis* [(MHOM/VE/80/H-16) NR-

368 29184], *L. braziliensis* [(MHOM/BR/75/M2903) ATCC-50135], *L. guyanensis*  
369 [(MHOM/BR/75M4147), ATCC-50126], and *L. panamensis* [(MHOM/PA/94/PSC-1), NR-  
370 50162]. Prior to infection parasites were washed once with HBSS and counted by hemocytometer  
371 prior to resuspending in the indicated assay media.

372

### 373 *Human chemokine detection*

374 Human CXCL10 mRNA and protein were detected after infection *in vitro*. At the time of  
375 harvest, infected cells were spun at 200g for 5 minutes and the supernatants removed and stored  
376 at -80°C storage for cytokine detection. Cells were resuspended in RNAlater Cell Reagent  
377 (Qiagen) and stored at -80°C prior to extracting RNA with RNeasy RNA extraction kit (Qiagen).  
378 Reverse transcriptase was performed using iScript Reverse Transcriptase kit (BioRad, 1708840).  
379 Quantitative real-time PCR (qRT-PCR) was performed using iTaq Universal Probes Supermix  
380 (Biorad, 1725135) with human CXCL10 (Thermo, Hs01124252) or rRNA45s5 (Thermo,  
381 Hs03928990\_g1). Relative expression was calculated by the  $\Delta\Delta C_t$  method relative to the rRNA45s5  
382 housekeeping gene. hCXCL10 protein concentration in supernatant was assayed by ELISA (R&D,  
383 266-IP).

384

### 385 *Prediction and modeling of CXCL10 binding site on GP63*

386 *In silico* prediction of the CXCL10 binding site on GP63 involved two sequential steps  
387 utilizing the amino sequence and solved crystal structures in the Protein Data Bank (GP63: 1lml  
388 and CXCL10: 1o7y). First, the primary amino acid sequences for GP63 and CXCL10 were input  
389 to the the xgBoost Interface Prediction of Specific-Partner Interactions (BIPSPI)(34) webserver  
390 (<http://bipspi.cnb.csic.es/xgbPredApp/>) to predict the interacting residues. Second, the crystal



391 structures for GP63 and CXCL10 were uploaded to the Zdock webserver  
392 (<http://zdock.umassmed.edu/>)(39) to model the protein-protein docking interaction. The Zdock  
393 modeling was performed under two sets of conditions: 1) blinded to any knowledge of predicted  
394 contact residues and 2) with the contact residues identified by BIPSPI specified. The top ten  
395 models for the GP63-CXCL10 interaction under each conditioned were visualized using  
396 PyMol(54). Distance measurements were performed with the PyMol “distancetoatom” function  
397 relative to the catalytic zinc ion in GP63 (PDB 1lml).

398

### 399 *Evolutionary analysis of GP63 sequences*

400 To examine the evolutionary pressure on GP63 we 1) identified a set of GP63 sequences  
401 to create a multisequence alignment, 2) tested for the degree of conservation at each amino acid  
402 residue, and 3) tested for episodic positive selection at individual amino acid residues. First, GP63  
403 sequences were identified using BlastP with *gp63* from *L. major* Fd (*LmjF\_10.0460*) used as a  
404 query (E: 0.01, no low complexity filter) on TriTrypDB(55) to search all *Leishmania* spp. The  
405 identified sequences and identifying information were downloaded. The publicly available  
406 sequences were then filtered based on the following characteristics: length (greater than half the  
407 length of the reference GP63 (302 amino acids), presence of ambiguous amino acids, genomic  
408 location (restricted to the chromosome 10 locus of GP63). The remaining 54 full length nucleotide  
409 sequences from the chromosome 10 locus were then aligned using ClustalOmega(56). Finally,  
410 using AliView(57) the alignment was manually inspected, all stop codons were removed, and the  
411 nucleotide sequence was translated to amino acid sequence. Second, the degree of conservation  
412 at each position was analyzed using the ConSurf(41) server with the ConSeq(42) method. The  
413 translated amino acid sequence created above was uploaded, the 3D structure was not specified in

414 order to include residues from the complete peptide (the crystal structure was only solved  
415 beginning at residue 100), setting *LmjF\_10.0460* as the query sequence, calculating the  
416 phylogenetic tree by Bayesian method. Third, episodic positive selection was tested for by the  
417 Mixed Effects Model for Evolution(43) on the Datamonkey 2.0 server(58) using the nucleotide  
418 alignment generated above. The empirical bayes factor was mapped onto the generated  
419 phylogenetic tree using the ggtree(59) package in R(60). Prior to mapping the phylogenetic tree  
420 was rooted to the node at the base of the *Sauroleishmania* subgenus using the root function in the  
421 ape package(61).

422

#### 423 *Expression of recombinant GP63 and Site-Directed Mutagenesis*

424 Overexpression and mutagenesis of GP63 was performed as described previously(23). In  
425 brief, 250,000 HEK293T cells were washed once with PBS, resuspended in serum free, FreeStyle  
426 293 Expression Media (ThermoFisher, 12338018), and plated in a 6-well tissue culture treated  
427 dish 48 hours before transfection. One hour prior to transfection, media was replaced with fresh  
428 FreeStyle 293 media. Transfections were performed following the manufacturer's protocol with  
429 the Lipofectamine 3000 transfection reagent kit. Supernatants were harvested 48 hours after  
430 transfection and stored in single use aliquots in low binding tubes at -80°C. Site directed  
431 mutagenesis was performed using the Agilent Quick Change Site Directed Mutagenesis kit per the  
432 manufacturers protocol.

433

#### 434 *CXCL10 and azocasein cleavage assays*

435 To assay GP63 activity two substrates were used: human CXCL10 and the non-specific  
436 colorimetric protease substrate azocasein. To normalize the total number of live parasites assayed:

437 8mL of a day 6 culture of promastigotes was washed once with HBSS and counted by  
438 hemocytometer to load at total of equal number of parasites for each substrate reaction. For  
439 heterologous expressed GP63, the relative amount of GP63 in each reaction was normalized based  
440 on total GP63 detected by western blot for the C-terminal histidine epitope tag. Protein was first  
441 separated by electrophoresis in a 4-20% bis-tris polyacrylamide gel before transferring to PVDF  
442 membrane using a Hoefer TE77X semi-dry transfer system. GP63 was detected by primary anti-  
443 his antibody (Cell Signaling Technology, 12698) with a secondary anti-rabbit fluorescent probe  
444 (Licor, IRDye 800CW) and developed with LiCor Odyssey Infrared Imaging System. Relative  
445 band intensity was quantified and used to produce even loading of GP63 mutants in the subsequent  
446 cleavage reaction. Dilutions of the GP63 mutants were rerun by western to confirm that equal  
447 amounts of protease were added to all reactions.

448 To monitor GP63 cleavage of CXCL10, normalized live parasites ( $1 \times 10^6$ ) or  
449 heterologously expressed GP63 was incubated with 500pg/ml of human recombinant CXCL10  
450 (Peprotech) for the indicated time at 37°C. The remaining CXCL10 was assayed by hCXCL10  
451 enzyme-linked immunosorbent assay (ELISA) (R&D, 266-IP). The cleaved fraction of CXCL10  
452 was calculated by subtracting the remaining measured CXCL10 from the no parasite or no  
453 transfection control. To monitor GP63 cleavage of azocasein cleavage 50  $\mu$ l of normalized live  
454 parasites ( $5 \times 10^7$ ) or heterologously expressed GP63 was incubated with 200 $\mu$ l of 50mg/ml of  
455 azocasein (Sigma, A2765) for the indicated time at 37°C. To stop the reaction 50 $\mu$ l of the reaction  
456 was added to 200 $\mu$ l of 5% trichloroacetic acid (TCA). The precipitate was spun at 2200g for 10  
457 minutes, and 150 $\mu$ l of supernatant transferred to a clean well of a clear bottom 96-well plate and  
458 add 112.5 $\mu$ l of 500mM NaOH to each well. Absorbance was subsequently measured at OD440

459 using a BioTek microplate reader. The cleaved fraction of azocasein was calculated relative to the  
460 no parasite or no transfection control.

461

#### 462 Quantification of gp63 expression

463 To quantify *gp63* expression, mRNA was obtained from day 6 of promastigote cultures of  
464 either *L. (L.) major* or *L. (V.) panamensis*. Parasites were washed once with HBSS and counted by  
465 hemocytometer prior to resuspending at  $1 \times 10^6$  parasites in 60 $\mu$ l. A total of 4mL of parasites were  
466 incubated at 37°C for 1 hour to mimic the THP-1 infection conditions. At the end of 1 hour,  
467 parasites were spun at 1300g for 10 minutes and resuspended in buffer RLT from the RNeasy Mini  
468 Kit (Qiagen). Genomic DNA was removed from the sample using TurboDNase (Thermo,  
469 AM2239) per manufacturers protocol. cDNA synthesis was performed with the iScript Reverse  
470 Transcriptase kit (BioRad, 1708840). qPCR reactions were performed using the iTaq Universal  
471 SYBR Green Mastermix (BioRad, 172-5124) with 50nm of each primer and 4 $\mu$ l of cDNA for gene  
472 targets or 4 $\mu$ l of cDNA for housekeeping genes in a final reaction volume of 10 $\mu$ l. Relative  
473 expression was calculated as  $\Delta$ Ct.

474 Primers for *gp63* were designed to capture all copies in the chromosome 10 locus for *L.*  
475 (*L.*) *major* and *L. (V.) panamensis*. For *L. (L.) major* there are four copies of *gp63* in a tandem  
476 array of which 1 copy is sufficiently divergent from the other three to require unique primers.  
477 Therefore, one set of primers were designed to amplify *LmjF\_10.0460*, *LmjF\_10.0465*, and  
478 *LmjF\_10.0480* (Fwd: CCGTCACCCGGGCCTT, Rev: CAGCAACGAAGCATGTGCC) and a  
479 separate set of primers to amplify *LmjF\_10.0470* (Fwd: TTGAGCGGTGGAATGAGAGG, Rev:  
480 AGTGCCATGAGAGAGAGAACT). For *L. (V.) panamensis* all our copies were homologous  
481 enough to utilize one set of primers for all four copies: *LPMP\_100410*, *LPMP\_100420*,

482 *LPMP\_100430*, and *LPMP\_100440* (Fwd: CCGACTTCGTGCTGTACGTC, Rev:  
483 TGAAGCCGAGGGCGTG). Previously described primers for the  $\alpha$ -tubulin housekeeping  
484 gene(62) were used as a control because the gene is highly conserved between *L. (L.) major* and  
485 *L. (V.) panamensis*.

486

#### 487 Whole genome assembly and analysis of *gp63* substrate specific alleles

488 To quantify the natural diversity of GP63 sites involved in CXCL10 substrate specificity,  
489 we reassembled the whole genomes of 26 samples from *Viannia* subgenus parasites, including 19  
490 *L. (V.) panamensis* and 7 *L. (V.) braziliensis* parasites. Raw data (.sra) were downloaded from two  
491 previous studies (44, 45). The module *fastq-dump* from NCBI SRA toolkit v2.10.9  
492 (<https://github.com/ncbi/sra-tools/>) was used to convert the raw data to FASTQ format. BWA-  
493 MEM v0.1.17(63) was then used to align all short reads to the *L. (V.) panamensis* PSC-1 reference  
494 genome. The reference genome was downloaded from TriTrypDB database (available at  
495 [https://tritrypdb.org/tritrypdb/app/record/dataset/DS\\_21a844223f](https://tritrypdb.org/tritrypdb/app/record/dataset/DS_21a844223f)). On this reference genome,  
496 there are four *gp63* copies (gene names: *LPMP\_100410*, *LPMP\_100420*, *LPMP\_100430*,  
497 *LPMP\_100440*) on chromosome 10, and one distantly related *gp63*-like protein (*LPMP\_311850*)  
498 on chromosome 31 which was not included in this study.

499 Sequence alignment to the reference genome was performed with minimum seed length of  
500 exact match as 19 (-k). Duplicated reads were marked and filtered by *Picard* using the  
501 *MarkDuplicates* function (*Picard* was downloaded from <http://broadinstitute.github.io/picard>).  
502 SAMTOOLS v1.9 (64) was then used to sort and index BAM files, and the module BCFTOOLS  
503 used to pileup, count read depth, and call variants with quality filtering score of 30 (-q=30). The  
504 final variants were stored into a VCF file. Since the alleles of a variant can have different

505 representations, we used *vt* (65) to normalize variants, and then removed duplicate variants to  
506 avoid potential inconsistent calling bias. Next, we counted the read depth mapped to GP63 protein  
507 position 463 position. All amino acid numbering for *gp63* described here is reported relative to the  
508 *L. (L.) major* gene *10.0460*. A total of four types of amino acid codons were observed: N (AAT,  
509 AAC), D (GAT, GAC), T (ACT) and A (GCT). Then we counted the number of reads mapped to  
510 each codon for each sample. To account for differences in the sequence library size, the final values  
511 were normalized by total library size and multiplied by a scale factor of 10000.

512

### 513 **Acknowledgements**

514 We are grateful to Jeffrey Bourgeois and Kyle Gibbs for thoughtful discussion and support  
515 throughout this project. ALA was supported by a Triangle Center for Evolutionary Medicine  
516 (TriCEM) graduate student fellowship and by the Burroughs Welcome Fund Graduate Diversity  
517 Enrichment Program. ATM was supported by an MGM SURE Scholarship. ALA, ATM, LW, and  
518 DCK were supported by Duke Molecular Genetics and Microbiology discretionary funds.

519

520

521

522

- 523 1. Alvar J, Velez ID, Bern C, Herrero M, Desjeux P, Cano J, Jannin J, den Boer M, Team  
524 WHOLC. 2012. Leishmaniasis worldwide and global estimates of its incidence. *PLoS One*  
525 7:e35671.
- 526 2. Burza S, Croft SL, Boelaert M. 2018. Leishmaniasis. *Lancet* 392:951-970.
- 527 3. Bailey F, Mondragon-Shem K, Hotez P, Ruiz-Postigo JA, Al-Salem W, Acosta-Serrano A,  
528 Molyneux DH. 2017. A new perspective on cutaneous leishmaniasis-Implications for  
529 global prevalence and burden of disease estimates. *PLoS Negl Trop Dis* 11:e0005739.
- 530 4. Ponte-Sucre A, Gamarro F, Dujardin JC, Barrett MP, Lopez-Velez R, Garcia-Hernandez  
531 R, Pountain AW, Mwenechanya R, Papadopoulou B. 2017. Drug resistance and treatment  
532 failure in leishmaniasis: A 21st century challenge. *PLoS Negl Trop Dis* 11:e0006052.
- 533 5. Heinzl FP, Sadick MD, Holaday BJ, Coffman RL, Locksley RM. 1989. Reciprocal  
534 expression of interferon gamma or interleukin 4 during the resolution or progression of  
535 murine leishmaniasis. Evidence for expansion of distinct helper T cell subsets. *J Exp Med*  
536 169:59-72.
- 537 6. Scott P, Natovitz P, Coffman RL, Pearce E, Sher A. 1988. Immunoregulation of cutaneous  
538 leishmaniasis. T cell lines that transfer protective immunity or exacerbation belong to  
539 different T helper subsets and respond to distinct parasite antigens. *J Exp Med* 168:1675-  
540 84.
- 541 7. Ajdary S, Alimohammadian MH, Eslami MB, Kemp K, Kharazmi A. 2000. Comparison  
542 of the immune profile of nonhealing cutaneous Leishmaniasis patients with those with  
543 active lesions and those who have recovered from infection. *Infect Immun* 68:1760-4.
- 544 8. Carvalho EM, Correia Filho D, Bacellar O, Almeida RP, Lessa H, Rocha H. 1995.  
545 Characterization of the immune response in subjects with self-healing cutaneous  
546 leishmaniasis. *Am J Trop Med Hyg* 53:273-7.
- 547 9. Castellano LR, Filho DC, Argiro L, Dessein H, Prata A, Dessein A, Rodrigues V. 2009.  
548 Th1/Th2 immune responses are associated with active cutaneous leishmaniasis and clinical  
549 cure is associated with strong interferon-gamma production. *Hum Immunol* 70:383-90.
- 550 10. Lee SH, Charmoy M, Romano A, Paun A, Chaves MM, Cope FO, Ralph DA, Sacks DL.  
551 2018. Mannose receptor high, M2 dermal macrophages mediate nonhealing *Leishmania*  
552 major infection in a Th1 immune environment. *J Exp Med* 215:357-375.
- 553 11. Anderson CF, Mendez S, Sacks DL. 2005. Nonhealing infection despite Th1 polarization  
554 produced by a strain of *Leishmania major* in C57BL/6 mice. *J Immunol* 174:2934-41.
- 555 12. Novais FO, Carvalho LP, Graff JW, Beiting DP, Ruthel G, Roos DS, Betts MR,  
556 Goldschmidt MH, Wilson ME, de Oliveira CI, Scott P. 2013. Cytotoxic T cells mediate  
557 pathology and metastasis in cutaneous leishmaniasis. *PLoS Pathog* 9:e1003504.
- 558 13. Novais FO, Carvalho LP, Passos S, Roos DS, Carvalho EM, Scott P, Beiting DP. 2015.  
559 Genomic profiling of human *Leishmania braziliensis* lesions identifies transcriptional  
560 modules associated with cutaneous immunopathology. *J Invest Dermatol* 135:94-101.
- 561 14. Bacellar O, Lessa H, Schriefer A, Machado P, Ribeiro de Jesus A, Dutra WO, Gollob KJ,  
562 Carvalho EM. 2002. Up-regulation of Th1-type responses in mucosal leishmaniasis  
563 patients. *Infect Immun* 70:6734-40.
- 564 15. Ives A, Ronet C, Prevel F, Ruzzante G, Fuertes-Marraco S, Schutz F, Zangger H, Revaz-  
565 Breton M, Lye LF, Hickerson SM, Beverley SM, Acha-Orbea H, Launois P, Fasel N,  
566 Masina S. 2011. *Leishmania* RNA virus controls the severity of mucocutaneous  
567 leishmaniasis. *Science* 331:775-8.

- 568 16. Rossi M, Castiglioni P, Hartley MA, Eren RO, Prevel F, Desponds C, Utschneider DT,  
569 Zehn D, Cusi MG, Kuhlmann FM, Beverley SM, Ronet C, Fasel N. 2017. Type I  
570 interferons induced by endogenous or exogenous viral infections promote metastasis and  
571 relapse of leishmaniasis. *Proc Natl Acad Sci U S A* 114:4987-4992.
- 572 17. Crosby EJ, Clark M, Novais FO, Wherry EJ, Scott P. 2015. Lymphocytic Choriomeningitis  
573 Virus Expands a Population of NKG2D+CD8+ T Cells That Exacerbates Disease in Mice  
574 Coinfected with *Leishmania major*. *J Immunol* 195:3301-10.
- 575 18. Kaye P, Scott P. 2011. Leishmaniasis: complexity at the host-pathogen interface. *Nat Rev*  
576 *Microbiol* 9:604-15.
- 577 19. Gupta G, Oghumu S, Satooskar AR. 2013. Mechanisms of immune evasion in leishmaniasis.  
578 *Adv Appl Microbiol* 82:155-84.
- 579 20. Olivier M, Atayde VD, Isnard A, Hassani K, Shio MT. 2012. *Leishmania* virulence factors:  
580 focus on the metalloprotease GP63. *Microbes Infect* 14:1377-89.
- 581 21. Joshi PB, Kelly BL, Kamhawi S, Sacks DL, McMaster WR. 2002. Targeted gene deletion  
582 in *Leishmania major* identifies leishmanolysin (GP63) as a virulence factor. *Mol Biochem*  
583 *Parasitol* 120:33-40.
- 584 22. Corradin S, Ransijn A, Corradin G, Roggero MA, Schmitz AA, Schneider P, Mauel J,  
585 Vergeres G. 1999. MARCKS-related protein (MRP) is a substrate for the *Leishmania*  
586 *major* surface protease leishmanolysin (gp63). *J Biol Chem* 274:25411-8.
- 587 23. Antonia AL, Gibbs KD, Trahair ED, Pittman KJ, Martin AT, Schott BH, Smith JS,  
588 Rajagopal S, Thompson JW, Reinhardt RL, Ko DC. 2019. Pathogen Evasion of Chemokine  
589 Response Through Suppression of CXCL10. *Front Cell Infect Microbiol* 9:280.
- 590 24. Peacock CS, Seeger K, Harris D, Murphy L, Ruiz JC, Quail MA, Peters N, Adlem E, Tivey  
591 A, Aslett M, Kerhornou A, Ivens A, Fraser A, Rajandream MA, Carver T, Norbertczak H,  
592 Chillingworth T, Hance Z, Jagels K, Moule S, Ormond D, Rutter S, Squares R, Whitehead  
593 S, Rabinowitsch E, Arrowsmith C, White B, Thurston S, Bringaud F, Baldauf SL,  
594 Faulconbridge A, Jeffares D, Depledge DP, Oyola SO, Hilley JD, Brito LO, Tosi LR,  
595 Barrell B, Cruz AK, Mottram JC, Smith DF, Berriman M. 2007. Comparative genomic  
596 analysis of three *Leishmania* species that cause diverse human disease. *Nat Genet* 39:839-  
597 47.
- 598 25. Llanes A, Restrepo CM, Del Vecchio G, Anguizola FJ, Lleonart R. 2015. The genome of  
599 *Leishmania panamensis*: insights into genomics of the *L. (Viannia)* subgenus. *Sci Rep*  
600 5:8550.
- 601 26. Ibraim IC, de Assis RR, Pessoa NL, Campos MA, Melo MN, Turco SJ, Soares RP. 2013.  
602 Two biochemically distinct lipophosphoglycans from *Leishmania braziliensis* and  
603 *Leishmania infantum* trigger different innate immune responses in murine macrophages.  
604 *Parasit Vectors* 6:54.
- 605 27. Valdivia HO, Scholte LL, Oliveira G, Gabaldon T, Bartholomeu DC. 2015. The  
606 *Leishmania* metaphylome: a comprehensive survey of *Leishmania* protein phylogenetic  
607 relationships. *BMC Genomics* 16:887.
- 608 28. Medina LS, Souza BA, Queiroz A, Guimaraes LH, Lima Machado PR, EMC, Wilson ME,  
609 Schriefer A. 2016. The gp63 Gene Cluster Is Highly Polymorphic in Natural *Leishmania*  
610 (*Viannia*) *braziliensis* Populations, but Functional Sites Are Conserved. *PLoS One*  
611 11:e0163284.
- 612 29. Rogers MB, Hilley JD, Dickens NJ, Wilkes J, Bates PA, Depledge DP, Harris D, Her Y,  
613 Herzyk P, Imamura H, Otto TD, Sanders M, Seeger K, Dujardin JC, Berriman M, Smith



- 614 DF, Hertz-Fowler C, Mottram JC. 2011. Chromosome and gene copy number variation  
615 allow major structural change between species and strains of *Leishmania*. *Genome Res*  
616 21:2129-42.
- 617 30. Victoir K, Arevalo J, De Doncker S, Barker DC, Laurent T, Godfroid E, Bollen A, Le Ray  
618 D, Dujardin JC. 2005. Complexity of the major surface protease (msp) gene organization  
619 in *Leishmania* (*Viannia*) *braziliensis*: evolutionary and functional implications.  
620 *Parasitology* 131:207-14.
- 621 31. da Silva Vieira T, Arango Duque G, Ory K, Gontijo CM, Soares RP, Descoteaux A. 2019.  
622 *Leishmania braziliensis*: Strain-Specific Modulation of Phagosome Maturation. *Front Cell*  
623 *Infect Microbiol* 9:319.
- 624 32. Ma L, Chen K, Meng Q, Liu Q, Tang P, Hu S, Yu J. 2011. An evolutionary analysis of  
625 trypanosomatid GP63 proteases. *Parasitol Res* 109:1075-84.
- 626 33. Alvarez-Valin F, Tort JF, Bernardi G. 2000. Nonrandom spatial distribution of  
627 synonymous substitutions in the GP63 gene from *Leishmania*. *Genetics* 155:1683-92.
- 628 34. Sanchez-Garcia R, Sorzano COS, Carazo JM, Segura J. 2019. BIPSPI: a method for the  
629 prediction of partner-specific protein-protein interfaces. *Bioinformatics* 35:470-477.
- 630 35. Cerda-Costa N, Gomis-Ruth FX. 2014. Architecture and function of metallopeptidase  
631 catalytic domains. *Protein Sci* 23:123-44.
- 632 36. McGwire BS, Chang KP. 1996. Posttranslational regulation of a *Leishmania* HEXXH  
633 metalloprotease (gp63). The effects of site-specific mutagenesis of catalytic, zinc binding,  
634 N-glycosylation, and glycosyl phosphatidylinositol addition sites on N-terminal end  
635 cleavage, intracellular stability, and extracellular exit. *J Biol Chem* 271:7903-9.
- 636 37. Macdonald MH, Morrison CJ, McMaster WR. 1995. Analysis of the active site and  
637 activation mechanism of the *Leishmania* surface metalloproteinase GP63. *Biochim*  
638 *Biophys Acta* 1253:199-207.
- 639 38. Button LL, Wilson G, Astell CR, McMaster WR. 1993. Recombinant *Leishmania* surface  
640 glycoprotein GP63 is secreted in the baculovirus expression system as a latent  
641 metalloproteinase. *Gene* 134:75-81.
- 642 39. Pierce BG, Wiehe K, Hwang H, Kim BH, Vreven T, Weng Z. 2014. ZDOCK server:  
643 interactive docking prediction of protein-protein complexes and symmetric multimers.  
644 *Bioinformatics* 30:1771-3.
- 645 40. Nash A, Birch HL, de Leeuw NH. 2017. Mapping intermolecular interactions and active  
646 site conformations: from human MMP-1 crystal structure to molecular dynamics free  
647 energy calculations. *J Biomol Struct Dyn* 35:564-573.
- 648 41. Ashkenazy H, Abadi S, Martz E, Chay O, Mayrose I, Pupko T, Ben-Tal N. 2016. ConSurf  
649 2016: an improved methodology to estimate and visualize evolutionary conservation in  
650 macromolecules. *Nucleic Acids Res* 44:W344-50.
- 651 42. Berezin C, Glaser F, Rosenberg J, Paz I, Pupko T, Fariselli P, Casadio R, Ben-Tal N. 2004.  
652 ConSeq: the identification of functionally and structurally important residues in protein  
653 sequences. *Bioinformatics* 20:1322-4.
- 654 43. Murrell B, Wertheim JO, Moola S, Weighill T, Scheffler K, Kosakovsky Pond SL. 2012.  
655 Detecting individual sites subject to episodic diversifying selection. *PLoS Genet*  
656 8:e1002764.
- 657 44. Patino LH, Munoz M, Muskus C, Mendez C, Ramirez JD. 2020. Intraspecific Genomic  
658 Divergence and Minor Structural Variations in *Leishmania* (*Viannia*) *panamensis*. *Genes*  
659 (Basel) 11.

- 660 45. Patino LH, Munoz M, Cruz-Saavedra L, Muskus C, Ramirez JD. 2020. Genomic  
661 Diversification, Structural Plasticity, and Hybridization in *Leishmania* (*Viannia*)  
662 *braziliensis*. *Front Cell Infect Microbiol* 10:582192.
- 663 46. Halle M, Gomez MA, Stuibler M, Shimizu H, McMaster WR, Olivier M, Tremblay ML.  
664 2009. The *Leishmania* surface protease GP63 cleaves multiple intracellular proteins and  
665 actively participates in p38 mitogen-activated protein kinase inactivation. *J Biol Chem*  
666 284:6893-908.
- 667 47. Gregory DJ, Godbout M, Contreras I, Forget G, Olivier M. 2008. A novel form of NF-  
668 kappaB is induced by *Leishmania* infection: involvement in macrophage gene expression.  
669 *Eur J Immunol* 38:1071-81.
- 670 48. Gomez MA, Contreras I, Halle M, Tremblay ML, McMaster RW, Olivier M. 2009.  
671 *Leishmania* GP63 alters host signaling through cleavage-activated protein tyrosine  
672 phosphatases. *Sci Signal* 2:ra58.
- 673 49. Matheoud D, Moradin N, Bellemare-Pelletier A, Shio MT, Hong WJ, Olivier M, Gagnon  
674 E, Desjardins M, Descoteaux A. 2013. *Leishmania* evades host immunity by inhibiting  
675 antigen cross-presentation through direct cleavage of the SNARE VAMP8. *Cell Host*  
676 *Microbe* 14:15-25.
- 677 50. Ramirez C, Diaz-Toro Y, Tellez J, Castilho TM, Rojas R, Ettinger NA, Tikhonova I,  
678 Alexander ND, Valderrama L, Hager J, Wilson ME, Lin A, Zhao H, Saravia NG,  
679 McMahan-Pratt D. 2012. Human macrophage response to *L. (Viannia) panamensis*:  
680 microarray evidence for an early inflammatory response. *PLoS Negl Trop Dis* 6:e1866.
- 681 51. Urrea DA, Duitama J, Imamura H, Alzate JF, Gil J, Munoz N, Villa JA, Dujardin JC,  
682 Ramirez-Pineda JR, Triana-Chavez O. 2018. Genomic Analysis of Colombian *Leishmania*  
683 *panamensis* strains with different level of virulence. *Sci Rep* 8:17336.
- 684 52. Bussotti G, Gouzou E, Cortes Boite M, Kherachi I, Harrat Z, Eddaikra N, Mottram JC,  
685 Antoniou M, Christodoulou V, Bali A, Guerfali FZ, Laouini D, Mukhtar M, Dumetz F,  
686 Dujardin JC, Smirlis D, Lechat P, Pescher P, El Hamouchi A, Lemrani M, Chicharro C,  
687 Llanes-Acevedo IP, Botana L, Cruz I, Moreno J, Jeddi F, Aoun K, Bouratbine A, Cupolillo  
688 E, Spath GF. 2018. *Leishmania* Genome Dynamics during Environmental Adaptation  
689 Reveal Strain-Specific Differences in Gene Copy Number Variation, Karyotype  
690 Instability, and Telomeric Amplification. *mBio* 9.
- 691 53. Taylor JS, Raes J. 2004. Duplication and divergence: the evolution of new genes and old  
692 ideas. *Annu Rev Genet* 38:615-43.
- 693 54. The PyMOL Molecular Graphics System VS, LLC.
- 694 55. Aslett M, Aurrecochea C, Berriman M, Brestelli J, Brunk BP, Carrington M, Depledge  
695 DP, Fischer S, Gajria B, Gao X, Gardner MJ, Gingle A, Grant G, Harb OS, Heiges M,  
696 Hertz-Fowler C, Houston R, Innamorato F, Iodice J, Kissinger JC, Kraemer E, Li W, Logan  
697 FJ, Miller JA, Mitra S, Myler PJ, Nayak V, Pennington C, Phan I, Pinney DF, Ramasamy  
698 G, Rogers MB, Roos DS, Ross C, Sivam D, Smith DF, Srinivasamoorthy G, Stoeckert CJ,  
699 Jr., Subramanian S, Thibodeau R, Tivey A, Treatman C, Velarde G, Wang H. 2010.  
700 TriTrypDB: a functional genomic resource for the Trypanosomatidae. *Nucleic Acids Res*  
701 38:D457-62.
- 702 56. McWilliam H, Li WZ, Uludag M, Squizzato S, Park YM, Buso N, Cowley AP, Lopez R.  
703 2013. Analysis Tool Web Services from the EMBL-EBI. *Nucleic Acids Research*  
704 41:W597-W600.

- 705 57. Larsson A. 2014. AliView: a fast and lightweight alignment viewer and editor for large  
706 datasets. *Bioinformatics* 30:3276-8.
- 707 58. Weaver S, Shank SD, Spielman SJ, Li M, Muse SV, Kosakovsky Pond SL. 2018.  
708 Datamonkey 2.0: A Modern Web Application for Characterizing Selective and Other  
709 Evolutionary Processes. *Mol Biol Evol* 35:773-777.
- 710 59. Guangchuang Yu DS, Huachen Zhu, Yi Guan, Tommy Tsan-Yuk Lam. 2017. ggtree: an R  
711 package for visualization and annotation of phylogenetic trees with their covariates and  
712 other associated data. *Methods in Ecology and Evolution*.
- 713 60. Anonymous. R Core Team (2019). R: A language and environment for statistical  
714 computing. R Foundation for Statistical Computing, Vienna, Austria. [https://www.R-](https://www.R-project.org/)  
715 [project.org/](https://www.R-project.org/).
- 716 61. Paradis E, Claude J, Strimmer K. 2004. APE: Analyses of Phylogenetics and Evolution in  
717 R language. *Bioinformatics* 20:289-90.
- 718 62. Pereira BA, Britto C, Alves CR. 2012. Expression of infection-related genes in parasites  
719 and host during murine experimental infection with *Leishmania* (*Leishmania*)  
720 *amazonensis*. *Microb Pathog* 52:101-8.
- 721 63. Li H. 2013. Aligning sequence reads, clone sequences and assembly contigs with BWA-  
722 MEM. arXiv:1303.3997.
- 723 64. Li H, Handsaker B, Wysoker A, Fennell T, Ruan J, Homer N, Marth G, Abecasis G, Durbin  
724 R, Genome Project Data Processing S. 2009. The Sequence Alignment/Map format and  
725 SAMtools. *Bioinformatics* 25:2078-9.
- 726 65. Tan A, Abecasis GR, Kang HM. 2015. Unified representation of genetic variants.  
727 *Bioinformatics* 31:2202-4.  
728
